# Supplementary material
Source: PubMed Central journal article supplement (PMC3772387)
Supplement: supp_126.18.4121_JCS121988.pdf [file supp_126.18.4121_JCS121988.pdf]

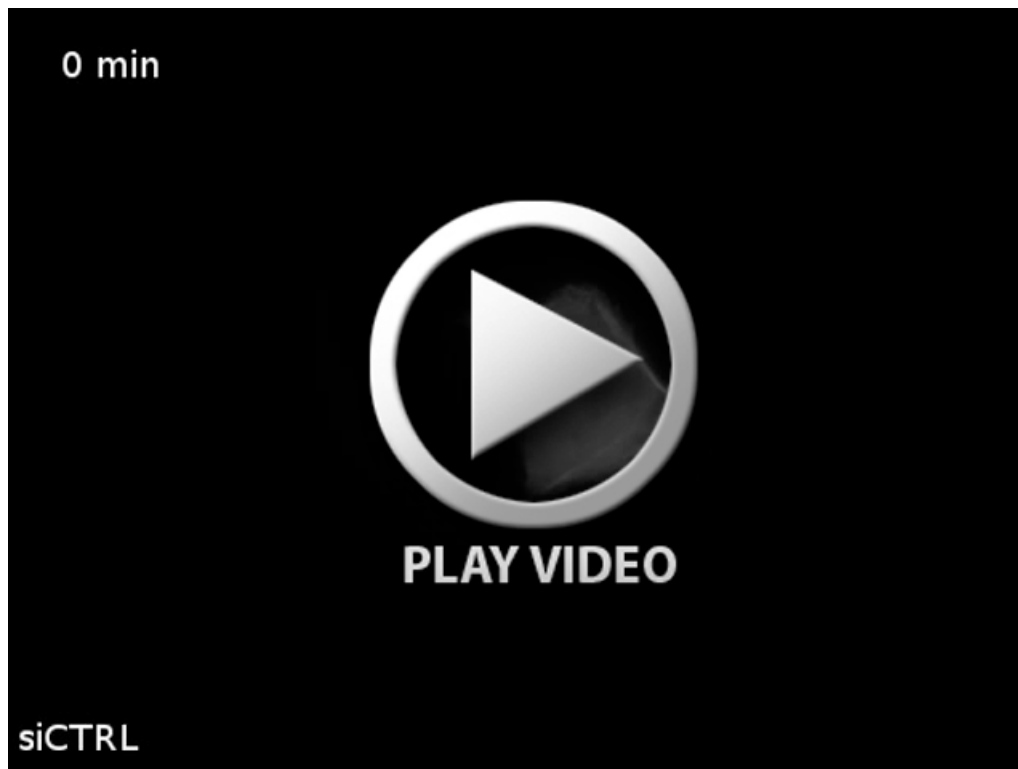

**Movie 1. Protrusion dynamics in siCTRL U2OS cell, related to figure 6.** siCTRL U2OS cells transiently expressing Lifeact-mEGFP were plated on FN for 4 h and imaged at 37°C on an Axiovert 200M live cell imaging system (Carl Zeiss) for 420 min at 1 frame every 180 s.

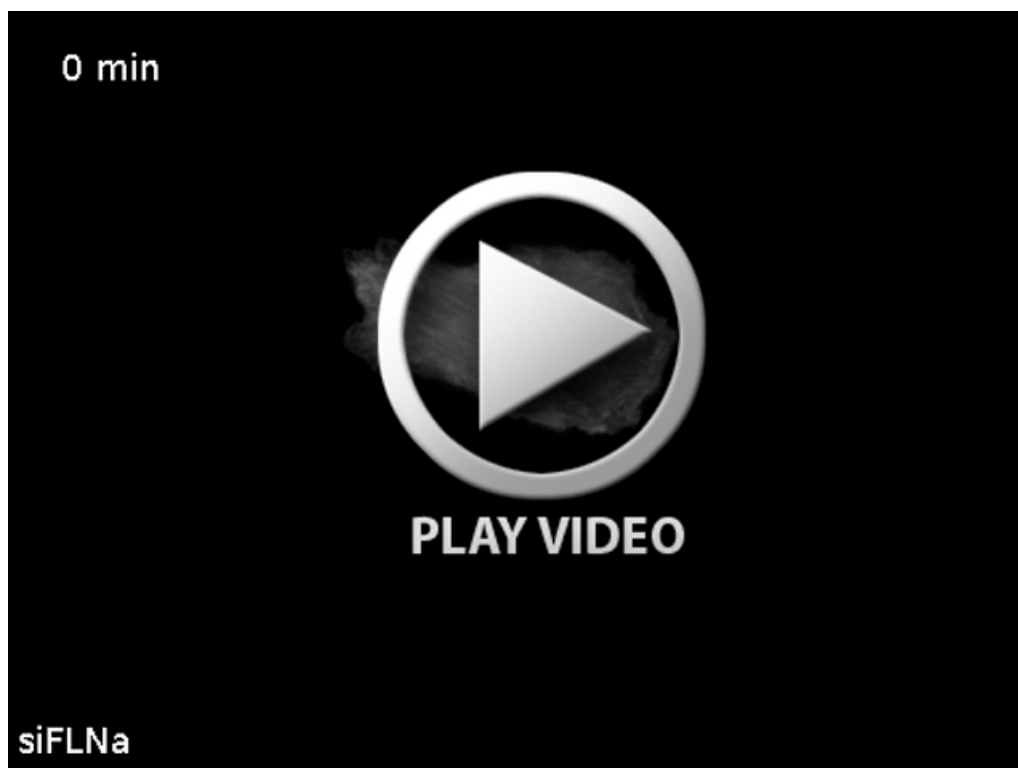

**Movie 2. Protrusion dynamics in siFLNa U2OS cell, related to figure 6.** siFLNa U2OS cells transiently expressing Lifeact-mEGFP were plated on FN for 4 h and imaged at 37°C on an Axiovert 200M live cell imaging system (Carl Zeiss) for 420 min at 1 frame every 180 s.

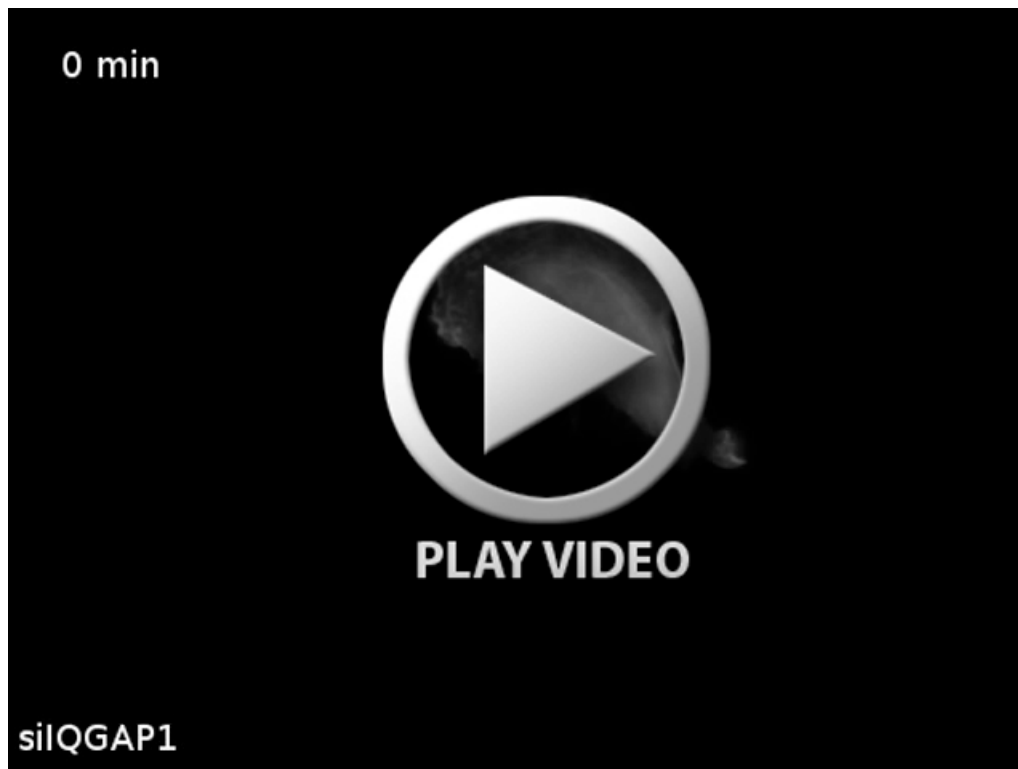

**Movie 3. Protrusion dynamics in siIQGAP1 U2OS cell, related to figure 6.** siIQGAP1 U2OS cells transiently expressing Lifeact-mEGFP were plated on FN for 4 h and imaged at 37°C on an Axiovert 200M live cell imaging system (Carl Zeiss) for 420 min at 1 frame every 180 s.

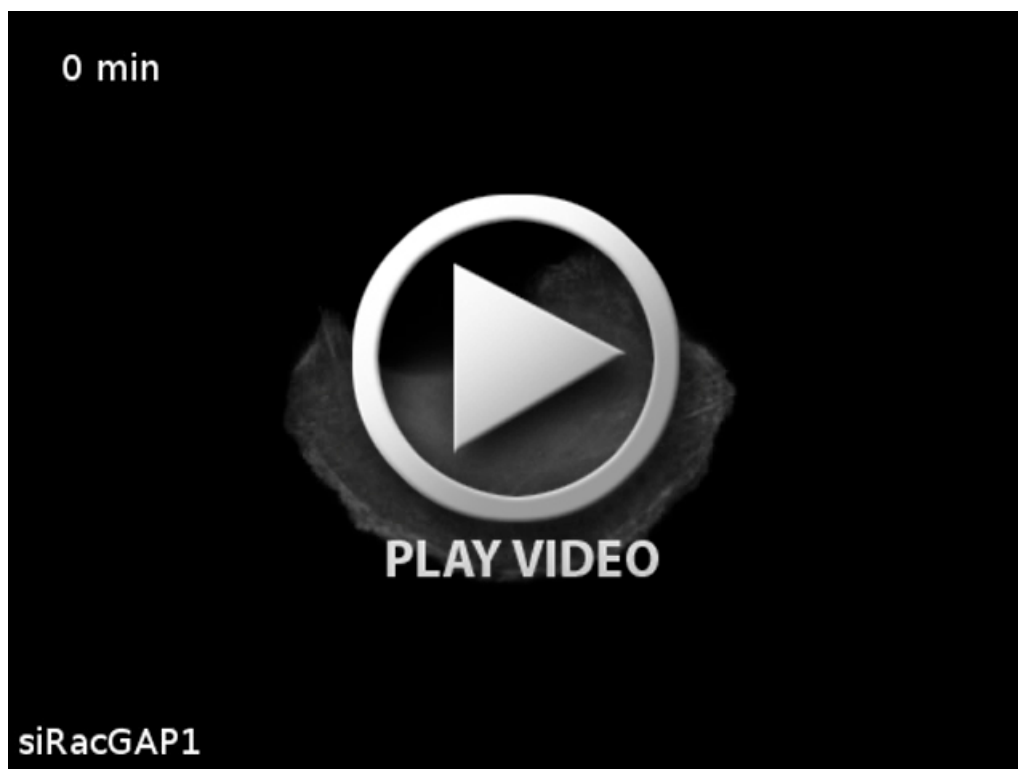

**Movie 4. Protrusion dynamics in siRacGAP1 U2OS cell, related to figure 6.** siRacGAP1 U2OS cells transiently expressing Lifeact-mEGFP were plated on FN for 4 h and imaged at 37°C on an Axiovert 200M live cell imaging system (Carl Zeiss) for 420 min at 1 frame every 180 s.

**Table S1. Proteins identified in the FLNa-GFP, IQGAP1-GFP, Rac1-GFP, RCC2-GFP and GFP pull-downs, related to figure 4.** Proteins recruited to FLNa-GFP, IQGAP1-GFP, Rac1-GFP, RCC2-GFP and GFP were analysed by liquid chromatography–tandem mass spectrometry. Three biological replicates were performed for each GFP pull-down. Relative protein abundance was calculated using the unweighted spectral count of a given protein normalised to the total number of spectra observed in the entire sample and to the molecular weight of that protein (normalised spectral count).

[Download Table S1](#)

**Table S2. Proteins enriched in the FLNa-GFP pull-downs, related to figure 4.** List of the proteins enriched to FLNa-GFP. Relative protein abundance was calculated using the unweighted spectral count of a given protein normalised to the total number of spectra observed in the entire sample and to the molecular weight of that protein (normalised spectral count). Proteins in the FLNa-GFP dataset enriched more than two-fold over controls (GFP and RCC2) were considered to be specifically recruited.

[Download Table S2](#)

**Table S3. Proteins enriched in the IQGAP1-GFP pull-downs, related to figure 4.** List of the proteins enriched to IQGAP1-GFP. Relative protein abundance was calculated using the unweighted spectral count of a given protein normalised to the total number of spectra observed in the entire sample and to the molecular weight of that protein (normalised spectral count). Proteins in the IQGAP1-GFP dataset enriched more than two-fold over controls (GFP and RCC2) were considered to be specifically recruited.

[Download Table S3](#)

**Table S4. Proteins enriched in the Rac1-GFP pull-downs, related to figure 4.** List of the proteins enriched to Rac1-GFP. Relative protein abundance was calculated using the unweighted spectral count of a given protein normalised to the total number of spectra observed in the entire sample and to the molecular weight of that protein (normalised spectral count). Proteins in the Rac1-GFP dataset enriched more than two-fold over the GFP control were considered to be specifically recruited.

[Download Table S4](#)

**Table S5. Proteins enriched in the RCC2-GFP pull-downs, related to figure 4.** List of the proteins enriched to RCC2-GFP. Relative protein abundance was calculated using the unweighted spectral count of a given protein normalised to the total number of spectra observed in the entire sample and to the molecular weight of that protein (normalised spectral count). Proteins in the RCC2-GFP dataset enriched more than two-fold over the GFP control were considered to be specifically recruited.

[Download Table S5](#)
